1 Authors: Alla Brodski-Guerniero<sup>1</sup>, Georg-Friedrich Paasch<sup>1</sup>, Patricia Wollstadt<sup>1</sup>, Ipek Özdemir<sup>1</sup>,  
2 Joseph T.Lizier<sup>2</sup>, Michael Wibral<sup>1</sup>  
3

4 <sup>1</sup>MEG Unit, Brain Imaging Center, J.W. Goethe University, Frankfurt a.M., Germany; <sup>2</sup>Complex  
5 Systems Research Group and Centre for Complex Systems, Faculty of Engineering & IT, The  
6 University of Sydney, NSW 2006, Australia  
7

8 **Title:**

9 Activating task relevant prior knowledge increases active information storage in content specific  
10 brain areas  
11

12

13

14

14 **Abstract (max 150 words)**

15 Predictive coding suggests that the brain infers the causes of its sensations by combining sensory  
16 evidence with internal predictions based on available prior knowledge. However, the  
17 neurophysiological correlates of (pre-)activated prior knowledge serving for predictions are still  
18 unknown. Based on the idea that such pre-activated prior-knowledge must be maintained until  
19 needed we measured the amount of maintained information in neural signals via the active  
20 information storage (AIS) measure. AIS was calculated on whole-brain beamformer-reconstructed  
21 source time-courses from magnetoencephalography recordings of 52 human subjects during the  
22 baseline of a Mooney face/house detection task. Pre-activation of prior knowledge for faces  
23 showed as alpha- and beta-band related AIS increases in content specific areas; these AIS  
24 increases were behaviourally relevant. Moreover, top-down transfer of predictions estimated by  
25 transfer entropy was associated with beta frequencies. Our results support accounts that activated  
26 prior knowledge and the corresponding predictions are signalled in low frequency activity (<30 Hz).

27 **Acknowledgements:**

28 ABG received support by Ernst Ludwig Ehrlich Studienwerk (BMBF scholarship for graduate  
29 students). GFP received support by Villigst Studienwerk (BMBF scholarship for graduate students).

30

31

32

32 **Introduction**

33 In the last decade, predictive coding theory has become a dominant paradigm to organize  
34 behavioral and neurophysiological findings into a coherent theory of brain function (George and  
35 Hawkins, 2009; Friston, 2010; Huang and Rao, 2011; Clark, 2012; Hohwy, 2013). Predictive  
36 coding theory proposes that the brain constantly makes inferences about the state of the outside  
37 world. This is supposed to be accomplished by building hierarchical internal predictions based on

38 prior knowledge which are compared to incoming information at each level of the cortical hierarchy  
39 in order to continuously adapt and update these internal models (Mumford, 1992; Rao et al., 1999;  
40 Friston, 2005, 2010)

41 The postulated use of predictions for inference requires several preparatory steps: First, task  
42 relevant prior knowledge passively stored in synaptic weights needs to be transferred into activated  
43 prior knowledge, i.e. information represented in neural activity in order to make this knowledge  
44 available to other parts of the brain (see Zipser et al., 1993 for a distinction of active and passive  
45 storage). Subsequently, (pre-)activated prior knowledge needs to be maintained until needed and  
46 to be constantly transferred as a prediction in top-down direction to a lower area of the cortical  
47 hierarchy, where it will be matched with the incoming information (e.g. Mumford, 1992; Friston,  
48 2005, 2010).

49 With respect to the neural correlates of activated prior knowledge and predictions we know that the  
50 prediction of specific features or object categories increases fMRI BOLD activity in the brain region  
51 at which the feature or category is usually processed (Puri et al., 2009; Esterman and Yantis, 2009;  
52 Kok et al., 2014). However, only little is known about how the maintenance of pre-activated prior  
53 knowledge and the corresponding transfer of predictions are actually implemented in neural activity  
54 proper.

55 As a first step towards resolving this issue recently a promising microcircuit theory of predictive  
56 coding has been put forward, suggesting internal predictions to be processed in deep cortical  
57 layers and to manifest in low frequency neural activity (<30 Hz) (Bastos et al., 2012). Accordingly  
58 this microcircuit theory also suggests that predictions are transferred via neural activity propagating  
59 along descending fiber systems in the same frequencies.

60 This theory is in line with the findings of a spectral predominance of low frequency neural activity in  
61 deep cortical layers (Buffalo et al., 2011) and the physiological findings linking specific anatomic  
62 pathways to specific Granger causality signatures, in particular feedback connections to alpha/beta  
63 frequency channels in monkeys (Bastos et al., 2015) and humans (Michalareas et al., 2016)

64 Recently, the microcircuit theory of predictive coding gained experimental support by  
65 neurophysiological studies showing the predictability of events (i.e. precision of predictions) to be

66 associated with neural power in the alpha (Bauer et al., 2014; Sedley et al., 2016) or beta  
67 frequency band (van Pelt et al., 2016)

68 However, the representation and signalling of pre-activated prior knowledge for predictions has  
69 been difficult to investigate with classical analysis methods. One reason is that classical analysis  
70 methods require a priori assumptions about which predictions specific brain areas are going to  
71 make - assumptions which might be very challenging beyond early sensory cortices and for  
72 complex experimental designs (Wibral et al., 2014, section 4.4, p. 9). Moreover, classical analysis  
73 methods do not allow to quantify the *amount* of pre-activated prior knowledge for predictions, as for  
74 instance diminished neural activity measured by fMRI, MEG or EEG may still come with less or  
75 more information being maintained in these signals. To overcome these problems we studied the  
76 maintenance and signalling of pre-activated prior knowledge for predictions using the information-  
77 theoretic measures of active information storage (AIS, see Methods in Lizier et al., 2012; also see  
78 Gómez et al., 2014 for an application in a MEG study), and transfer entropy (TE, Schreiber, 2000;  
79 Vicente et al., 2011). . AIS measures the amount of information in the future of a process predicted  
80 by its past (predictable information) while TE measures the amount of directed information transfer  
81 between two processes.

82 The use of AIS and TE is based on the following rationale: Since the brain will usually not know  
83 exactly when a prediction will be needed, it will maintain activated prior knowledge related to the  
84 content of the prediction over time. If there is a reliable neural code that maps between content and  
85 activity, maintained activated prior knowledge must be represented as maintained information  
86 content in neural signals, measurable by AIS (Figure 1). Further, predictions based on prior  
87 knowledge are supposed to be transferred to lower brain areas, where they can be matched with  
88 incoming information. This information transfer is measurable with TE.

89 From this basic concept we can derive four testable hypotheses about AIS and TE in the predictive  
90 coding framework:

- 91 1. When activated prior knowledge is maintained, predictable information as measured by AIS is  
92 supposed to be high in brain areas specific to the content of the predictions.
- 93 2. If the microcircuit theory of predictive coding is correct, maintenance of pre-activated prior

94 knowledge should be reflected in alpha/beta frequencies, i.e., predictable information and  
95 alpha/beta power should correlate.

96 3. Information transfer related to predictions (i.e. signalling of pre-activated prior knowledge  
97 measured by TE) should occur in a top-down direction from brain areas showing increased  
98 predictable information, and should be reflected in alpha/beta band Granger causality.

99 4. As predictions based on pre-activated prior knowledge are known to facilitate performance,  
100 predictable information is supposed to correlate with behavioural parameters, if it reflects the  
101 relevant pre-activated prior knowledge.

102

103 These hypotheses were tested here on neural source activity reconstructed from  
104 magnetoencephalography (MEG) recordings of 52 human subjects during the performance of a  
105 two-tone (Mooney and Ferguson, 1951; Cavanagh, 1991) Face/House detection task (Figure 2). In  
106 this task subjects were instructed to detect faces during half of the experimental blocks (Face  
107 blocks) and houses during the other half (House blocks) in a stream of two-tone images containing  
108 faces, houses and scrambled versions thereof. These instructions were given to subjects at the  
109 beginning of each block of stimulus presentations to induce the pre-activation of face- or house-  
110 related prior knowledge, respectively. This task was designed based on the rationale that  
111 recognition of two-tone stimuli cannot be accomplished without relying on prior knowledge from  
112 previous experience, as is evident for example from the late onset of two-tone image recognition  
113 capabilities during development (> 4 years of age, Mooney, 1957), and from theoretical  
114 considerations (Kemelmacher-Shlizerman et al., 2008).

115

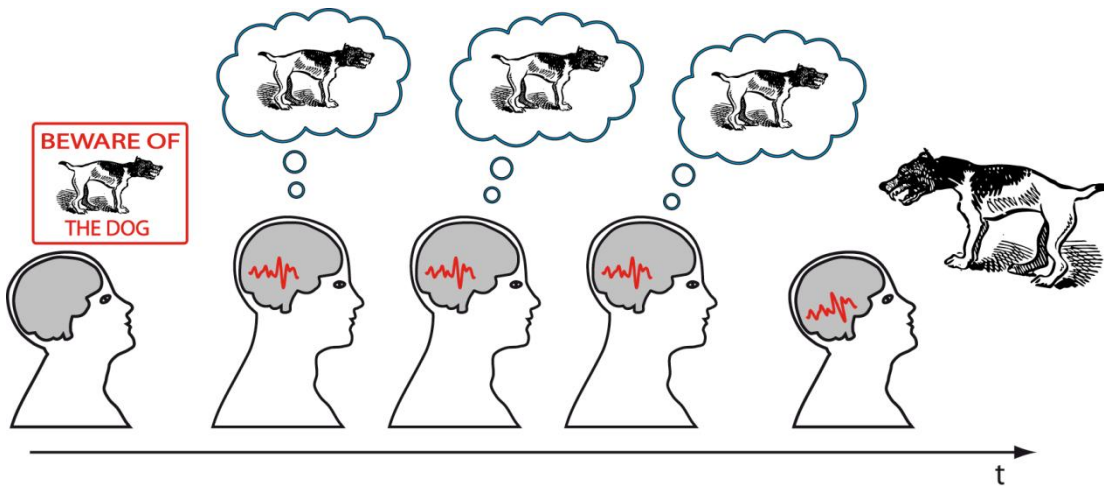

116

117 **Figure 1. Central idea of the study.** Typically, pre-activated prior knowledge related to the  
 118 content of a prediction has to be maintained as the brain will not know exactly when it will be  
 119 needed. If there is a reliable neural code that maps between content and activity, maintained  
 120 activated prior knowledge should lead to brain signals that are themselves predictable over time  
 121 (here the brain signals are depicted as identical, although the relation between past and future will  
 122 almost certainly be much more complicated). Figure elements obtained from OpenCliparts Library  
 123 (<http://www.opencliparts.org>) and modified.

124

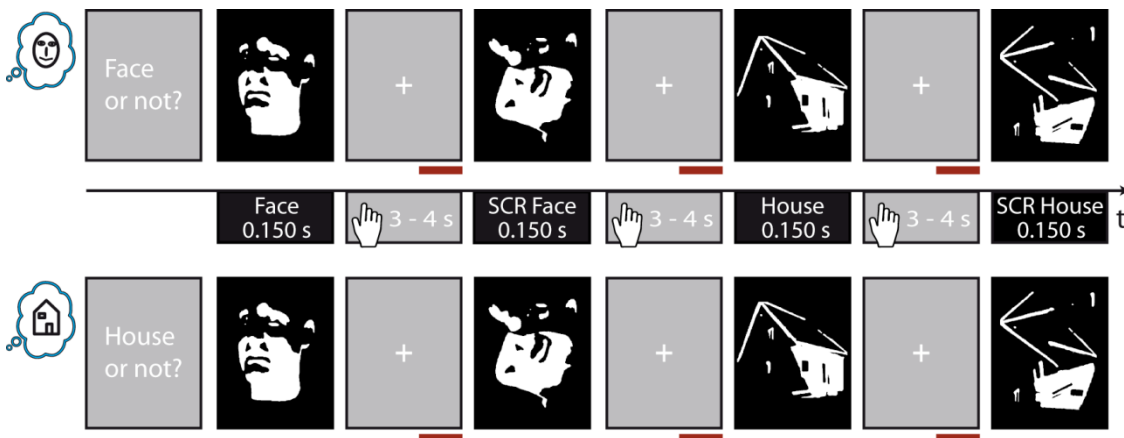

125

126 **Figure 2. Experimental design.** *Top and bottom:* Exemplary stimulus presentation in Face blocks  
 127 (*top*) and in House blocks (*bottom*). Face and House icons on the left indicate Face and House  
 128 blocks, respectively. *Middle:* Depiction of stimulus categories and timing. The beginning of the  
 129 response time window is indicated by the hand icon. Red horizontal bars mark the analysis  
 130 interval. SCR - Scrambled Mooney stimuli, not representing a face or house.

131 **Results**

132 **Behavioral results**

133 We found no differences between Face blocks and House blocks for hitrates (avg. hitrate Face  
134 blocks 93.9%; avg. hitrate House blocks 94.6%; Wilcoxon Signed rank test  $p=0.57$ ) and reaction  
135 times of correct responses (avg. mean reaction times Face blocks 0.545 s, avg. reaction times  
136 House blocks 0.546 s; Wilcoxon Signed rank test  $p=0.85$ ). Subjects showed equivalent behavioural  
137 patterns for both block types, for instance increased reaction times for the instructed stimulus  
138 conditions as these stimuli had to be distinguished from a similar distractor (SCR stimuli) (see  
139 Figure 3 for the analysis of behavioural differences between stimulus conditions within block  
140 types).

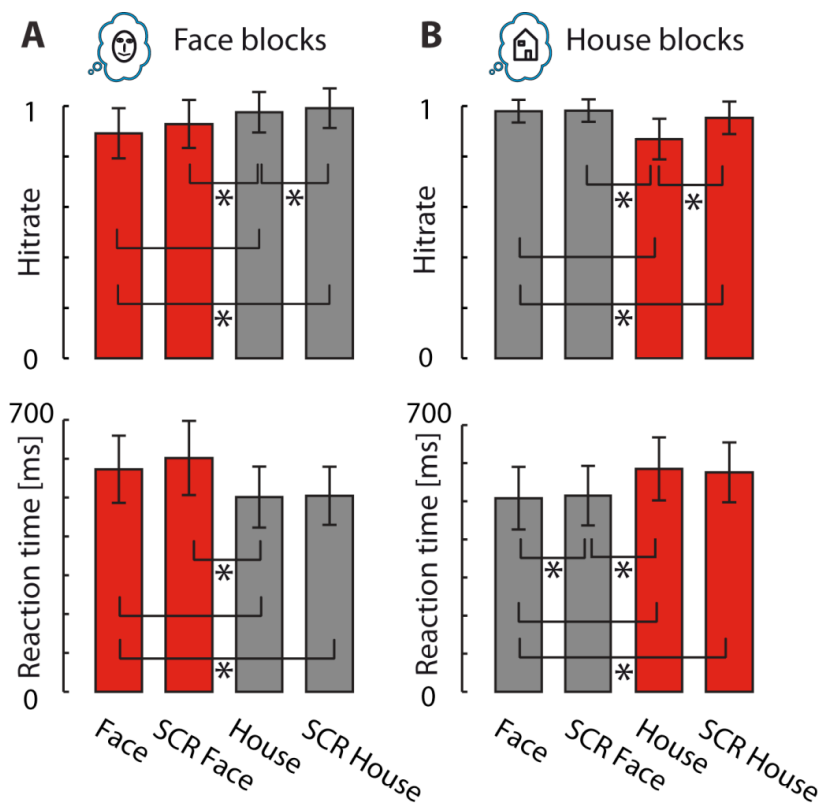

141

142 **Figure 3. Behavioral results.** Depiction of hitrates and reaction times of correct responses for (A)  
143 Face blocks and (B) House blocks. Equivalent conditions in different block types are marked in red  
144 and grey, respectively. Asterisks indicate significant differences based on Wilcoxon signed-rank  
145 tests within block type ( $n = 52$ ; Bonferroni-Holms corrected for multiple comparisons). Error bars  
146 indicate standard deviation. SCR – scrambled Mooney stimuli.

147 ***Analysis of predictable information***

148 To find the neural correlates of activated prior knowledge we focussed our analysis of the MEG  
149 recordings on the prestimulus interval up to 1 second before stimulus onset, as this time interval is  
150 not confounded by the responses to the visual stimuli. For this time range we used a LCMV  
151 beamformer to reconstruct the source time courses for the whole brain (1.5 cm grid spacing,  
152 resulting in 478 brain locations). Each source time course was then subjected to analysis of active  
153 information storage (AIS, Lizier et al., 2012), quantifying predictable information in the signals.  
154 Statistical comparisons of AIS values between Face blocks and House blocks revealed increased  
155 AIS values for Face blocks in clusters in fusiform face area (FFA), anterior inferior temporal cortex  
156 (aIT), occipital face area (OFA), posterior parietal cortex (PPC) and primary visual cortex (V1)  
157 (Figure 4). We referred to these five brain areas as “face prediction network” and subjected it to  
158 further analyses. In contrast to this finding of a face prediction network, we did not find brain areas  
159 showing significantly higher AIS values in House blocks compared to Face blocks.

160

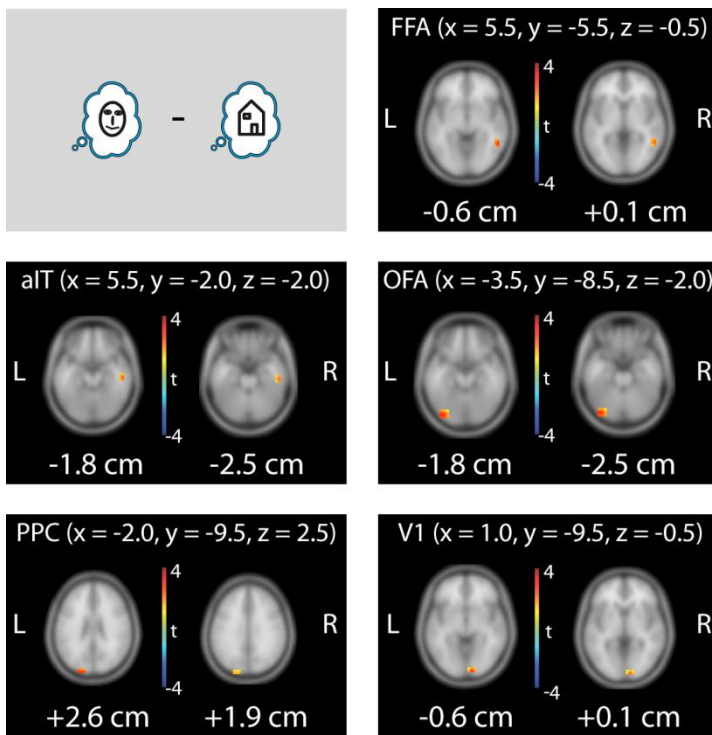

161

162

163

164

165

166

167

168

169

170

171

172

173

174

175

176

177

**Figure 4. Statistical analysis of predictable information (measured by AIS) at the MEG source level.** Results of whole-brain dependent samples permutation t-metric contrasting Face blocks and House blocks (n=52, t-values masked by  $p < 0.05$ , cluster correction). Peak voxel coordinates in MNI space are shown at the top for each brain location; z-values are displayed below each brain slice. OFA = occipital face area; FFA = fusiform face area; aIT= anterior inferior temporal cortex; PPC = posterior parietal cortex; V1 = primary visual cortex

### ***Correlation of single trial power and single trial predictable information***

In order to investigate the neurophysiological correlates of activated prior knowledge identified via AIS analysis, a correlation analysis of single trial power in distinct frequency bands with single trial AIS was conducted. To this end, frequency bands were defined by a statistical comparison of MEG sensor-level activity in the task vs. baseline interval (jointly for Face and House Blocks, see Methods for details). Correlation analysis revealed a strong positive correlation in the alpha and beta frequency bands, only very small mostly positive correlations in the low and mid-gamma frequency bands and a small negative correlation for the high-gamma frequency band (Table 1). This means that alpha and beta band activity is the most likely carrier of activated prior knowledge.

While we found a significant correlation of single trial power and predictable information in the



178 alpha and beta band, the contrast map over all source grid points for Face and House blocks (t-  
 179 values obtained from dependent sample t-metric over subjects) did not correlate for neither alpha  
 180 nor beta power with the AIS map (alpha rho = 0.043, p = 0.33; beta rho = 0.05, p = 0.21). This  
 181 suggests that AIS analysis provides additional information not directly provided by a spectral  
 182 analysis. In sum, while AIS seems to be carried by alpha/beta-band activity, not all alpha/beta band  
 183 activity contributes to AIS.

184 Table 1: Correlation of single trial power and single trial predictable information (measured by AIS)  
 185 in the face prediction network

|                                        | <b>OFA</b>                                      | <b>aIT</b>                                      | <b>PPC</b>                                      | <b>V1</b>                                       | <b>FFA</b>                                      |
|----------------------------------------|-------------------------------------------------|-------------------------------------------------|-------------------------------------------------|-------------------------------------------------|-------------------------------------------------|
| <b>8-14 Hz<br/>(alpha)</b>             | <b><i>rho = 0.58</i></b><br><i>p &lt; 0.001</i> | <b><i>rho = 0.54</i></b><br><i>p &lt; 0.001</i> | <b><i>rho = 0.59</i></b><br><i>p &lt; 0.001</i> | <b><i>rho = 0.61</i></b><br><i>p &lt; 0.001</i> | <b><i>rho = 0.58</i></b><br><i>p &lt; 0.001</i> |
| <b>14-32 Hz<br/>(beta)</b>             | <b><i>rho = 0.53</i></b><br><i>p &lt; 0.001</i> | <b><i>rho = 0.52</i></b><br><i>p &lt; 0.001</i> | <b><i>rho = 0.53</i></b><br><i>p &lt; 0.001</i> | <b><i>rho = 0.52</i></b><br><i>p &lt; 0.001</i> | <b><i>rho = 0.54</i></b><br><i>p &lt; 0.001</i> |
| <b>32-56 Hz<br/>(low<br/>gamma)</b>    | rho = 0.13<br><i>p &lt; 0.001</i>               | rho = 0.10<br><i>p &lt; 0.001</i>               | rho = 0.17<br><i>p &lt; 0.001</i>               | rho = 0.14<br><i>p &lt; 0.001</i>               | rho = 0.13<br><i>p &lt; 0.001</i>               |
| <b>56-64 Hz<br/>(Mid-<br/>gamma)</b>   | rho = 0.06<br><i>p &lt; 0.001</i>               | rho = -0.004<br><i>p=0.22</i>                   | rho = 0.07<br><i>p &lt; 0.001</i>               | rho = 0.07<br><i>p &lt; 0.001</i>               | rho = 0.02<br><i>p &lt; 0.001</i>               |
| <b>64-150 Hz<br/>(High-<br/>gamma)</b> | rho = -0.07<br><i>p &lt; 0.001</i>              | rho = -0.14<br><i>p &lt; 0.001</i>              | rho = -0.04<br><i>p &lt; 0.001</i>              | rho = -0.04<br><i>p &lt; 0.001</i>              | rho = -0.09<br><i>p &lt; 0.001</i>              |

186 ***Analysis of information transfer***

187 To understand how activated prior knowledge is communicated within the cortical hierarchy, we  
 188 assessed the information transfer within the face prediction network in the prestimulus interval by  
 189 estimating transfer entropy (TE, Schreiber, 2000) on source time courses for Face blocks and  
 190 House blocks, respectively. Statistical analysis revealed significantly increased information transfer  
 191 for Face blocks from aIT to FFA ( $p=0.0001$ , fdr correction) and from PPC to FFA ( $p = 0.0014$ , fdr  
 192 correction). For House blocks information transfer was increased in comparison to Face blocks  
 193 from brain area V1 to PPC ( $p=0.0014$ , fdr correction) (Figure 5).

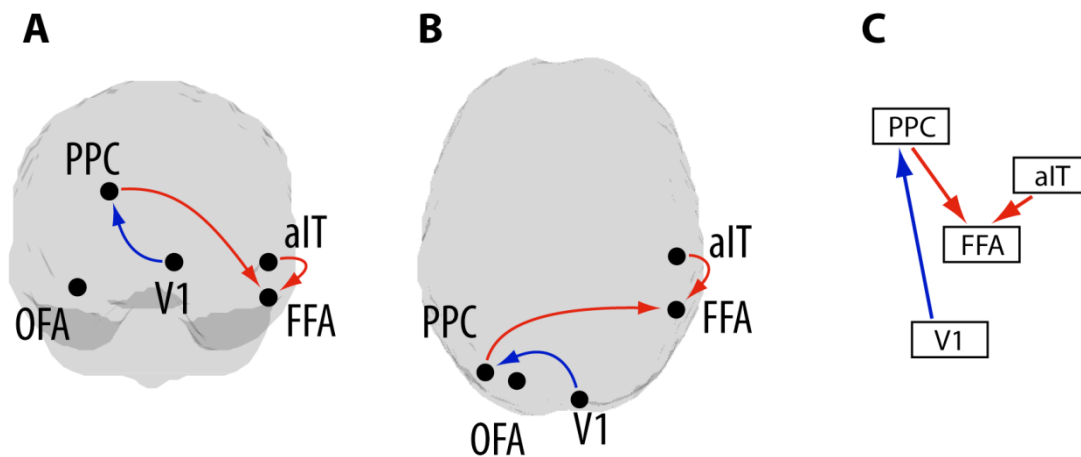

194

195 **Figure 5. Analysis of information transfer in the prestimulus interval.** Results of dependent  
196 sample permutation t-tests on transfer entropy (TE) values (Face blocks vs House blocks,  $n = 52$ ,  
197  $p < 0.05$ , *fdr* corrected). Red arrows indicate increased information transfer for Face blocks, blue  
198 arrows indicate increased information transfer for House blocks. Illustration of the resulting network  
199 in A) a view from the back of the brain, B) view from the top of the brain, C) depiction of the  
200 network hierarchy (based on the hierarchy in Zhen et al., 2013; Michalareas et al., 2016).

201

### 202 ***Post-hoc frequency resolved Granger causality***

203 In order to investigate whether information transfer differences in Face and House blocks were  
204 reflected in specific frequency bands, we post-hoc performed a non-parametric spectral Granger  
205 causality analysis on the three links identified with transfer entropy analysis. For the link from PPC  
206 to FFA we found stronger Granger causality for Face blocks than House blocks in a cluster  
207 between 18 and 22 Hz (Figure 6,  $p=0.045$ , cluster correction for frequencies, uncorrected for the  
208 number of links in this post hoc test). The link from V1 to PPC showed a stronger Granger causal  
209 influence for House blocks than Face blocks between 94 and 98 Hz (Figure 6,  $p=0.042$ , cluster  
210 correction for frequencies, uncorrected for the number of links in this post hoc test). Using cluster  
211 correction, the link from aIT to FFA did not show significant differences in Granger causal  
212 influence.

213

214 ***Correlation of predictable information and reaction times***

215 In order to study the association of predictable information and behaviour, we correlated the per  
216 subject difference of AIS values between Face blocks and House blocks with the per subject  
217 difference in reaction times. This analysis was performed for the three brain areas between which  
218 we found increased information transfer during Face blocks (FFA, aIT and PPC). For these brain  
219 areas we tested the hypothesis that higher predictable information for face blocks was associated  
220 with faster performance, i.e. decreased reaction times during Face blocks. Indeed, negative  
221 correlation values were found for all of the three brain areas (Figure 7). However, only the  
222 correlation for FFA reached significance when correcting for the number of comparisons ( $\rho =$   
223  $0.30$ ,  $p = 0.015$ ;  $0.015 \times 3 < 0.05$ ). In order to be able to interpret also the non-significant results we  
224 additionally report the Bayes factor ( $BF_{01}$ ) for the three correlations. We find a  $BF_{01}$  of 3.89 for brain  
225 area FFA, a  $BF_{01}$  of 0.213 for aIT and a  $BF_{01}$  of 1.41 for PPC. As Bayes factors above three can be  
226 considered reliable evidence for the alternative hypothesis (here: negative correlation), while  
227 Bayes factors below 1/3 can be considered reliable evidence for the null hypothesis (here: no or  
228 positive correlation) (Jeffreys, 1998), our findings indicate that predictable information was  
229 behaviourally relevant in area FFA but not in area aIT. It remains inconclusive whether predictable  
230 information in brain area PPC was behaviourally relevant.

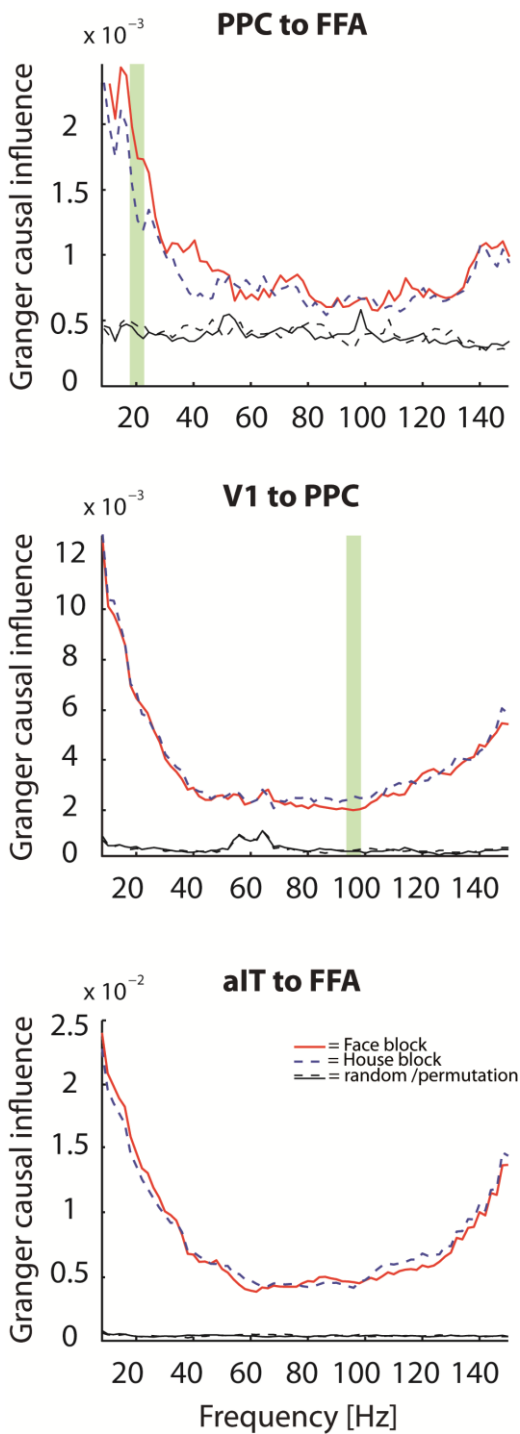

231

232 **Figure 6. Frequency resolved Granger causality – post-hoc test for TE analysis.** Granger  
233 causality for Face blocks and House blocks as well as random/permutation conditions. Green  
234 shaded regions indicate significant differences between Face and House blocks with cluster  
235 correction (dependent samples permutation t-test,  $n = 52$ ,  $p < 0.05$ ). Frequency ranges were only  
236 considered, if granger values for both block types in these frequencies also significantly differed  
237 from the random conditions (dependent samples permutation t-tests,  $n = 52$ , Bonferroni-Holms  
238 correction).

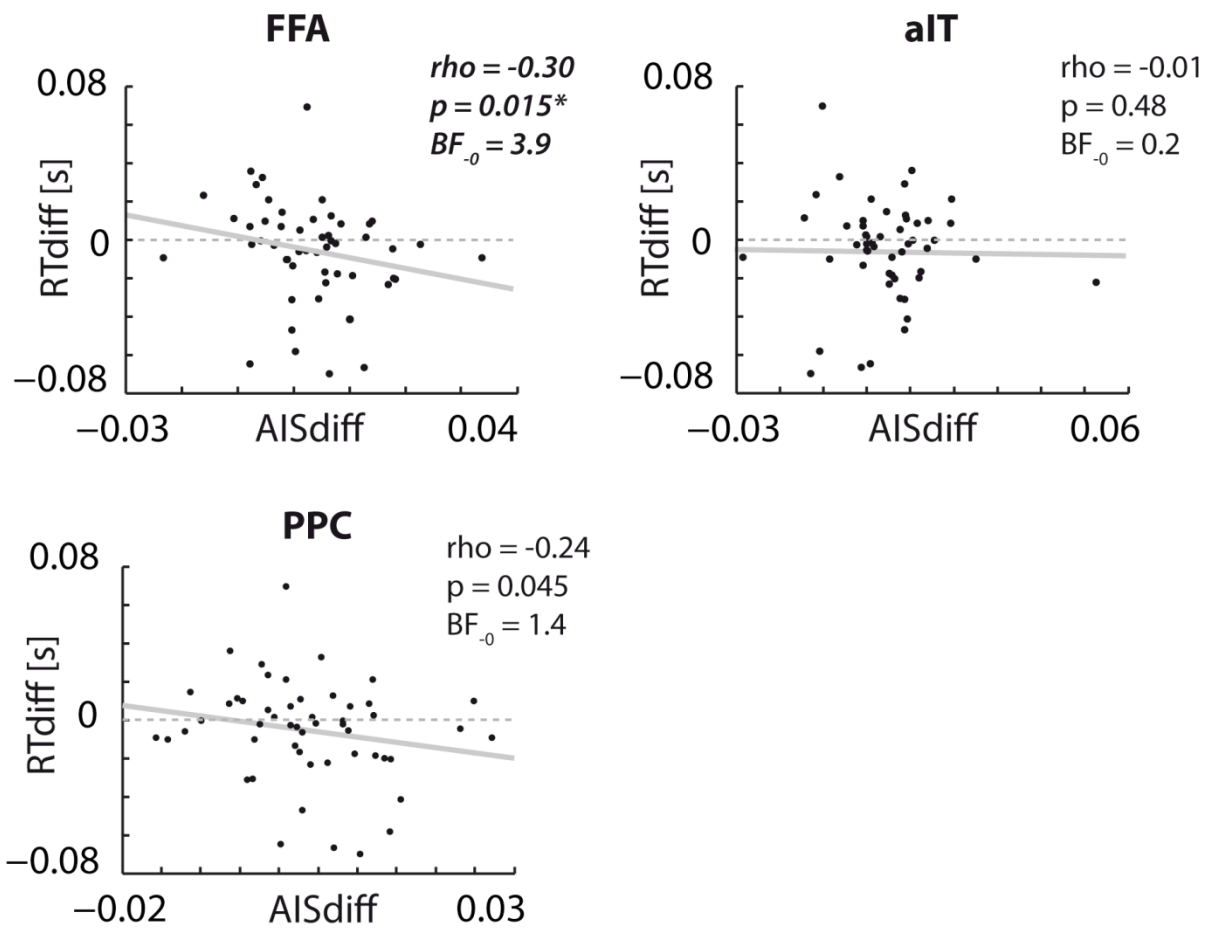

239

240

241

242

243

244

245

246

247

248

249

250

251

252

**Figure 7. Correlation analysis for predictable information (measured by AIS) and reaction times.** Scatter plots displaying the correlation of per subject AIS difference values (Face blocks – House blocks) with per subject reaction time difference values (Face blocks – House blocks). Spearman correlation values, p-values and Bayes factors ( $BF_{-0}$ ) are indicated at the top right corner of each plot ( $n = 52$ ). Asterisks indicates significant correlation, using Bonferroni correction for multiple comparisons ( $p \times 3 < 0.05$ ). Linear regression lines are included in gray (solid).

### Discussion

Here we tested the hypothesis that the neural correlates of prior knowledge that has been activated for use as an internal prediction must show as predictable information in the neural signals carrying that activated prior knowledge. This hypothesis is based on the rationale that the content of activated prior knowledge must be maintained until the knowledge or the prediction derived from it is used. The fact that activated prior knowledge has a specific content then mandates that increases in predictable information should be found in brain areas specific to

253 processing the respective content. This is indeed what we found when investigating the activation  
254 of prior knowledge about faces in intervals preceding stimulus presentation in a face detection  
255 task. In this task predictable information was selectively enhanced in a network of brain areas  
256 known for their role in face processing, and was related to improved task performance in brain area  
257 FFA. Given this established link between the activation of prior knowledge and predictable  
258 information we then tested current neurophysiological accounts of predictive coding which suggest  
259 that activated prior knowledge should be represented in deep cortical layers and at alpha or beta-  
260 band frequencies and should be communicated as a prediction along descending fiber pathways  
261 also in alpha/beta-band frequencies (Bastos et al., 2012). Indeed, within the network of brain areas  
262 related to activated prior knowledge of faces, information transfer was increased in top-down  
263 direction and related to Granger-causality in the beta band – in accordance with the theory. In the  
264 following we will detail the exact interpretation of increases in predictable information and discuss  
265 our findings in relation to specific predictions of predictive coding theory in more detail.

266 Predictable information as measured by AIS indicates that a signal is both rich in information and  
267 predictable at the same time. Note that neither a constant signal (predictable but low information  
268 content) nor a memory-less stochastic process (high information content but unpredictable) will  
269 exhibit high AIS values. In other words, a neural process with high AIS must visit many different  
270 possible states (rich dynamics), yet visit these states in a predictable manner with minimal  
271 branching of its trajectory (this is the meaning of the log ratio of equation (1) in the Methods  
272 section). As such, AIS is a general measure of information that is maintained in a process, and  
273 could here reflect any form of memory based on neural activity. AIS is linked specifically to  
274 activated prior knowledge in our study via the experimental manipulation that alternately activates  
275 face- or house-specific prior knowledge. This manipulation should increase AIS in content-specific  
276 brain areas, and this is indeed what we found. Hence, in the study of predictive coding theory, the  
277 observation of increased AIS must be seen as a necessary consequence of the maintenance of  
278 activated prior knowledge. Yet, the observation of increased AIS is not sufficient to indicate  
279 activated prior knowledge – any process requiring some form of information to be stored in neural  
280 activity (e.g. working memory) must lead to an observation of increased AIS when analysing the

281 relevant signal. Nevertheless, AIS is very useful tool to separate activated prior knowledge and  
282 predictions from other processes in predictive coding theory - especially from (unpredictable) error  
283 processing.

284 We will next discuss our AIS-related findings with respect to their implications for current theories  
285 of predictive coding.

## 286 **1. Activated prior-knowledge for faces shows as predictable information in content specific** 287 **areas**

288 We found increased predictable information as reflected by increased AIS values in Face blocks in  
289 the prestimulus interval in FFA, OFA, aIT, PPC and V1. Out of these five brain areas FFA, OFA as  
290 well as aIT are well known to play a major role in face processing (Kanwisher et al., 1997;  
291 Kriegeskorte et al., 2007; Tsao et al., 2008; Pitcher et al., 2011). Hence, increased predictable  
292 information for Face blocks in these brain areas supports the hypothesis of prior knowledge being  
293 activated in content specific brain areas.

294 In addition to increased predictable information in the well-known face processing areas we also  
295 found increased predictable information in Face blocks in PPC. We consider the increase in  
296 predictable information in PPC also as content-specific, because regions in posterior parietal  
297 cortex have been recently linked to high level visual processing of objects like faces (Pashkam and  
298 Xu, 2014) and an activation in the posterior parietal cortex has been repeatedly observed during  
299 the recognition of Mooney faces (Dolan et al., 1997; Grützner et al., 2010; Brodski et al., 2015).

300 In sum, our finding of increased predictable information for face blocks in FFA, OFA, aIT and PPC  
301 confirms our hypothesis that activation of face prior knowledge elevates predictable information in  
302 content specific areas.

303 These findings are in agreement with suggestions that content specific brain areas are in general  
304 activated in anticipation of a specific stimulus (Stokes et al., 2009; Peelen and Kastner, 2011; Kok  
305 et al., 2014) and that the FFA in particular is activated in anticipation of faces (Esterman and  
306 Yantis, 2009; Puri et al., 2009; Egnér et al., 2010). Most importantly however, our results add to

307 previous findings by demonstrating that anticipatory activity in face specific areas is indeed related  
308 to pre-activation and extended maintenance of content specific prior knowledge, reflected by the  
309 predictable character of the signal itself, as measurable with AIS.

310 Note that an increase in predictable information (AIS) is not necessarily predicted by accounting for  
311 preparatory processing as attentional feature/object selection in the sense of a subthreshold gain  
312 control mechanism (e.g. Corbetta et al., 1990). This is because gain control does not necessarily  
313 imply that any additional preparatory activity evoked by increased gains is temporally self-  
314 predicting. If our observation of increased predictable information is indeed the consequence of an  
315 attentional mechanism, e.g. altered baseline firing rates in content specific neurons (Desimone  
316 and Duncan, 1995, see also Hillyard et al., 1998), then our results would imply that this additional  
317 activity must highly patterned and predictable in the temporal domain. In other words, in this latter  
318 case the boundary between attention-related activity changes that increase information storage  
319 and a pre-activation of specific content in the sense of predictive coding theories may become  
320 blurred. Hence, a unified information theoretic description in terms of predictable information,  
321 measured by AIS, as an algorithmic quantity in the sense of Marr (1982) may serve our  
322 understanding better.

323 Our results also complement previous findings by demonstrating that prior knowledge about faces  
324 is pre-activated not only in FFA but in an extended face processing network. Since it has been  
325 suggested that e.g. FFA, OFA and aIT code for different aspects of face processing (e.g. Haxby et  
326 al., 2000; Pitcher et al., 2011), our results might indicate that different kinds of prior knowledge  
327 about faces, e.g. related to the general face configuration, but also to facial features or familiar  
328 identities is pre-activated in face detection tasks.

329 However, while we found increased predictable information in content specific areas for Face  
330 blocks, we did not find brain areas showing increased predictable information for House blocks.  
331 This is similar to other highly cited studies that failed to find prediction effects for houses in the  
332 brain in contrast to faces (e.g. Summerfield et al., 2006a, 2006b; Trapp et al., 2015). For instance,  
333 in a face/house discrimination task Summerfield and colleagues (2006b) observed increased



334 activation in FFA, when a house was misperceived as a face. However, they failed to see  
335 increased activation in parahippocampal place area (PPA), a scene/house responsive region,  
336 when a face was misperceived as a house. The authors suggest that this might be related to the  
337 fact that PPA is less subject to top-down information than FFA – as faces have much more  
338 regularities potentially utilizable for top-down mechanisms than the natural scenes that PPA  
339 usually responds to. Alternatively, they suggest, subjects may have employed a face prediction  
340 strategy by matching all input to face templates and judging a “No-face” to be a house. However,  
341 this explanation seems unlikely to apply in our design as a separate No-face (SCR) condition  
342 existed. Hence, in contrast to the design of Summerfield and colleagues, a No-face did not  
343 necessarily have to be a house in our design. Nevertheless, because of their strong social  
344 relevance (e.g. Farah et al., 1995) faces disproportionately capture attention (e.g. Vuilleumier and  
345 Schwartz, 2001). Thus, also face predictions/templates may be prioritized in comparison to other  
346 templates e.g. for houses. In general, it is possible that perceptual templates are more in use for  
347 expert categories like faces, for which holistic processing can be exploited (e.g. Esterman and  
348 Yantis, 2009; Puri et al., 2009; Van Belle et al., 2010).

349 In contrast to the absence of brain areas showing increased predictable information for house  
350 blocks in our study, in some fMRI studies researchers were able to observe an anticipatory effect  
351 for houses in PPA (Esterman and Yantis, 2009; Puri et al., 2009), indicating that prediction effects  
352 for houses are in general possible. Thus, it is worth considering that the house-responsive region  
353 PPA may not be well detectable with MEG, as it is a deep-lying source of activity. In fact, with the  
354 exception of a recent MEG/fMRI study of Baldauf and Desimone (2014) studying selective  
355 attention to faces or houses, to our knowledge, no MEG study was able to find activation in PPA  
356 for houses. Yet, even for the study of Baldauf and Desimone (2014) the brain locations showing an  
357 increased MEG activation when houses were attended noticeably differed from the PPA location  
358 obtained by fMRI.

359 Last, we note that the effect of increased AIS for Face blocks in content specific areas but not for  
360 House blocks cannot be simply explained by differential bottom-up information as the same  
361 Mooney images were presented in Face and House blocks and only the prestimulus interval was

362 analyzed.

363 In addition to elevated AIS in content specific areas for face blocks, we also found increased AIS  
364 for Face blocks in V1. This finding was surprising, as we did not expect prediction effects for faces  
365 to show up as “early” in the processing hierarchy as primary visual areas. Nevertheless,  
366 preparation effects in V1 have been previously observed (e.g Smith and Muckli, 2010; Peelen and  
367 Kastner, 2011; Kok et al., 2014) and may indicate that subjects also prepared to detect faces by  
368 low level features in our task. However, anticipation of low level features is not expected to be  
369 engaged more strongly for face than house preparation. Consequently, one may speculate that the  
370 house prediction was not used as consistently as the face prediction in our task - in line with our  
371 inability to find brain areas associated with increased AIS values for House blocks.

372 **2. Maintenance of activated prior knowledge about faces is reflected by increased**  
373 **alpha/beta power**

374 We found a strong positive single-trial correlation of AIS with alpha/beta power for all face  
375 prediction areas. This finding supports the assumption that especially the maintenance of activated  
376 prior knowledge as indexed by AIS is related to alpha and beta frequencies.

377 Previously, both alpha as well as beta frequencies have been linked with maintaining items in  
378 working memory (Jensen et al., 2002; Busch and Herrmann, 2003; Buschman and Miller, 2007;  
379 Kaiser et al., 2007) but have also been associated with more general functions related to  
380 maintenance of information in the brain like mental imagery (alpha, Cooper et al., 2006),  
381 implementation of an attentional set (beta, Bressler and Richter, 2015) and maintenance of the  
382 current cognitive state (beta, Engel and Fries, 2010)

383 More specifically and congruently with our findings, Mayer and colleagues (2015) recently showed  
384 that activation of prior knowledge about previously seen letters is associated with increased power  
385 in the alpha frequency range in the prestimulus interval. Also, Sedley and colleagues (2016)  
386 observed that the update of predictions, which also requires access to maintained activated  
387 knowledge, is associated with increased power in beta frequencies.

388 Extending previous findings, we are the first to report that single-trial low frequency activity strongly  
389 correlates with the momentary amount of activated prior knowledge in content specific brain areas.  
390 Specifically, our results demonstrate that the current amount of activated prior knowledge usable  
391 as predictions for face detection is associated with neural activity in the alpha and beta frequency  
392 range, supporting the hypothesis of a popular microcircuit theory of predictive coding (Bastos et al.,  
393 2012).

### 394 **3. Face predictions are transferred in a top-down manner and via beta frequencies**

395 In Face blocks we observed increased information transfer to FFA from aIT as well as from PPC,  
396 both areas located higher in the processing hierarchy than FFA (e.g. Zhen et al., 2013;  
397 Michalareas et al., 2016). Thus, FFA seems to have the role of a convergence center to which  
398 information from higher cortical areas is transferred in order to prepare for rapid face detection.

399 Both brain areas, PPC as well as aIT have been associated with memory processing (Erickson and  
400 Desimone, 1999; Sakai and Miyashita, 1991; Wagner et al., 2005) and in particular with memory  
401 related to faces or face templates (Dolan et al., 1997; Barton, 2008) making them plausible  
402 candidates for top-down preparatory information transfer to FFA. Closely related to our findings  
403 Esterman and Yantis (2009) observed that anticipation effects for faces in FFA (and houses in  
404 PPA) were associated with increased activity in a posterior IPS region (part of the PPC) extending  
405 to the occipital junction. However, to our knowledge our study is the first to report face related  
406 anticipatory top-down information transfer from PPC and aIT to FFA.

407 Top-down information transfer in a preparatory interval is in general supportive of the predictive  
408 coding account (Mumford, 1992; Rao et al., 1999; Friston, 2005, 2010), that suggests a top-down  
409 propagation of predictions. However, the concrete role of the top-down signals from PPC as well  
410 as aIT or the prediction “content” being transferred to FFA is unknown so far. One possibility would  
411 be that PPC, well known to be active for familiar stimuli (e.g. Wagner et al., 2005), may signal a set  
412 of faces with typical properties (i.e. feature combinations from the typical set). aIT, highly active for  
413 individual well known faces (e.g. Haxby et al., 2000), may signal the individually most probable  
414 face or faces to FFA in order to facilitate face detection. Thus, both serve predictions of high

415 statistical validity yet for different purposes (face detection vs. identification).

416 In addition to the two top-down links showing increased information transfer for Face blocks, we  
417 observed a bottom-up link from V1 to PPC with increased information transfer for House blocks. As  
418 we did not find a prediction network for houses and our analysis was thus only performed in the  
419 brain areas of the face prediction network, one can only speculate on the function of this bottom-up  
420 information transfer. It is possible that it indicates that house detection was rather performed in a  
421 bottom up manner for instance by first identifying low level features that distinguish houses from  
422 their scrambled counterparts.

423 Information transfer in top-down direction was associated with Granger causality in the beta  
424 frequency band (PPC to FFA), while information transfer in bottom-up direction was associated  
425 with Granger causality in the high gamma frequency band (V1 to PPC).

426 The association of top-down information transfer with beta frequencies and bottom-up information  
427 transfer with gamma frequencies is in line with recent physiological findings in monkeys and  
428 humans (Bastos et al., 2015; Michalareas et al., 2016) and has been linked with predictive coding  
429 in Bastos' microcircuit model (Bastos et al., 2012), resulting in the hypothesis of predictions being  
430 transferred top-down via low frequency channels and prediction errors bottom-up via high  
431 frequency channels. In accord with this hypothesis, our group has recently shown that prediction  
432 errors are communicated in the high frequency gamma band (Brodski et al., 2015). Our present  
433 finding of top-down information transfer in low beta frequencies during anticipation of faces adds  
434 support to the microcircuit model hypothesis of a low frequency channel for the top-down  
435 propagation of predictions (Bastos et al., 2012). In particular, low beta frequencies (<22 Hz) as  
436 observed in our experiment have been proposed as the main rhythm for inter-areal top-down  
437 processing, possibly conveying behavioural context like predictions or attentional set to lower-level  
438 sensory neurons (Bressler and Richter, 2015).

439 In line with our findings, the spectral dissociation between the transfer of predictions and of  
440 prediction errors recently received additional support from a MEG study applying Granger causality  
441 analysis for the investigation of information transfer during the prediction of causal events (van Pelt

442 et al., 2016). Van Pelt and colleagues recorded MEG activity while subjects watched bowling  
443 action animations with more or less predictable combinations of throwing direction and outcomes.  
444 Van Pelts' Granger causality findings suggest that top-down transfer of predictions from frontal to  
445 parietal to temporal regions is dominated by the beta-band while bottom up prediction error transfer  
446 from temporal to parietal to frontal regions is dominated by neural activity in the gamma frequency  
447 band.

448 It should be noted that van Pelt and colleagues defined their network of interest for Granger  
449 causality analysis based on the prior assumption of the involvement of these brain areas in causal  
450 inference, suggesting that predictions and prediction errors related to causal events should be  
451 transferred within that network. In contrast, a Granger causality analysis based on a network  
452 defined with AIS as performed in our study allows finding the brain areas involved in predictive  
453 processing without relying on prior assumptions about their function and thus the specific  
454 predictions transferred from specific brain areas. This makes AIS analysis applicable for a large  
455 variety of predictive coding designs, independent of the fact whether prediction areas can be  
456 defined in advance or not.

#### 457 **4. Pre-activation of prior knowledge about faces facilitates performance**

458 Across subjects we found elevated predictable information in FFA in Face blocks in contrast to  
459 House blocks to be associated with shorter reaction times for Face blocks compared to House  
460 blocks. This suggests that especially pre-activation of prior knowledge about faces in FFA  
461 facilitates processing and speeds up face detection, as also suggested by FFA effects in previous  
462 fMRI studies (Esterman and Yantis, 2009; Puri et al., 2009). Our study is however the first to  
463 demonstrate that the size of the facilitatory effect on perceptual performance depends on the  
464 quantity of activated prior knowledge for faces in FFA, measurable as the difference in AIS  
465 between face and house block for each subject. Inter-individual differences between subjects in the  
466 quantity of activated prior knowledge in FFA and thus also performance may be related to the  
467 differential ability in maintaining an object specific representation (see Ranganath et al., 2004).

468

469 Conclusion: Pre-activation of task relevant prior knowledge for predictions shows as alpha/beta  
470 related active information storage in content specific areas and is behaviourally relevant. Top-down  
471 prediction transfer from content specific areas is associated with neural activity in the low beta  
472 frequency band (18-22 Hz).

473

## 474 **Methods**

### 475 **Subjects**

476 57 subjects participated in the MEG experiment, 5 of these subjects had to be excluded due to  
477 excessive movements, technical problems, or unavailability of anatomical scans. 52 subjects  
478 remained for the analysis (average age: 24.8 years (SD 2.8), 23 males). Each subject gave written  
479 informed consent before the beginning of the experiment and was paid 10€ per hour for  
480 participation. The local ethics committee (Johann Wolfgang Goethe University clinics, Frankfurt,  
481 Germany) approved the experimental procedure. All subjects had normal or corrected-to-normal  
482 visual acuity and were right handed according to the Edinburgh Handedness Inventory scale  
483 (Oldfield, 1971). The large sample size subjects was chosen to reduce the risk of false positives,  
484 as suggested by Button and colleagues (2013).

### 485 **Stimuli and stimulus presentation**

486 Photographs of faces and houses were transformed into two-tone (black and white) images known  
487 as Mooney stimuli (Mooney and Ferguson, 1951).

488 In order to increase task difficulty additionally scrambled stimuli (SCR) were created from each of  
489 the resulting Mooney faces and Mooney houses by displacing the white or black patches within the  
490 given background. Thereby all low-level information was maintained but the configuration of the  
491 face or house was destroyed. Examples of the stimuli can be seen in Figure 2.

492 All stimuli were resized to a resolution of 591x754 pixels. Stimulus manipulations were performed  
493 with the program GIMP (GNU Image Manipulation Program, 2.4, free software foundation, Inc.,  
494 Boston, Massachusetts, USA).

495 A projector with a refresh rate of 60 Hz was used to display the stimuli at the center of a  
496 translucent screen (background set to gray, 145 cd/m<sup>2</sup>). Stimulus presentation during the  
497 experiment was controlled using the Presentation software package (Version 9.90,  
498 Neurobehavioral Systems).

499 The experiment consisted of eight blocks of seven minutes. In each block 120 stimuli were  
500 presented (30 Mooney faces, 30 Mooney houses, 30 SCR faces, 30 SCR houses) in a randomized  
501 order. Stimuli were presented for 150 ms with a vertical visual angle of 24.1 and a horizontal visual  
502 angle of 18.8 degrees. The inter-trial-interval between stimulus presentations was randomly jittered  
503 from 3 to 4 seconds (in steps of 100 ms).

#### 504 ***Task and Instructions***

505 Subjects performed a detection task for faces or houses (Figure 2). Each of the eight experimental  
506 blocks started with the presentation of a written instruction; four of the experimental blocks started  
507 with the instruction “Face or not?” while for the other four experimental blocks started with the  
508 instruction “House or not?”. The former are referred to as “Face blocks” and the latter as “House  
509 blocks”. Face and House blocks were presented in alternating order. The same blocks of stimuli  
510 were presented as Face blocks for half of the subjects, while for the other half of the subjects these  
511 experimental blocks appeared as House blocks and vice versa. This way, the initial block was  
512 alternated between subjects (i.e. half of the subjects started with Face blocks and the other half  
513 House block). Importantly, as the blocks contained the same face, house, SCR face and SCR  
514 house stimuli the only difference between face and house blocks was in the subjects’ instruction.  
515 To avoid accidental serial effects, order of blocks was reversed for half of the subjects.

516 Subject responded by pressing one of two buttons directly after stimulus presentation. The button  
517 assignment for a ‘Face’ or ‘No-Face’ response in Face blocks and ‘House’ or ‘No-House’ block was

518 counterbalanced across subjects (n=26 right index finger for 'Face' response).

519 Between stimulus presentations, subjects were instructed to fixate a white cross on the center of  
520 the gray screen. Further, they were instructed to maintain fixation during the whole block and to  
521 avoid any movement during the acquisition session. Before data acquisition, subjects performed  
522 Face and House test blocks of two minutes with stimuli not used during the actual task. During the  
523 test blocks subjects received a feedback whether their response was correct or not. No feedback  
524 was provided during the actual task.

### 525 ***Data acquisition***

526 MEG data acquisition was performed in line with recently published guidelines for MEG recordings  
527 (Gross et al., 2012). MEG signals were recorded using a whole-head system (Omega 2005; VSM  
528 MedTech Ltd.) with 275 channels. The signals were recorded continuously at a sampling rate of  
529 1200 Hz in a synthetic third-order gradiometer configuration and were filtered online with fourth-  
530 order Butterworth filters with 300 Hz low pass and 0.1 Hz high pass.

531 Subjects' head position relative to the gradiometer array was recorded continuously using three  
532 localization coils, one at the nasion and the other two located 1 cm anterior to the left and right  
533 tragus on the nasion-tragus plane for 43 of the subjects and at the left and right ear canal for 9 of  
534 the subjects.

535 For artefact detection the horizontal and vertical electrooculogram (EOG) was recorded via four  
536 electrodes; two were placed distal to the outer canthi of the left and right eye (horizontal eye  
537 movements) and the other two were placed above and below the right eye (vertical eye  
538 movements and blinks). In addition, an electrocardiogram (ECG) was recorded with two electrodes  
539 placed at the left and right collar bones of the subject. The impedance of each electrode was kept  
540 below 15 k $\Omega$ .

541 Structural magnetic resonance (MR) images were obtained with either a 3T Siemens Allegra or a  
542 Trio scanner (Siemens Medical Solutions, Erlangen, Germany) using a standard T1 sequence (3-D  
543 magnetization -prepared -rapid-acquisition gradient echo sequence, 176 slices, 1 x 1 x 1 mm voxel



544 size). For the structural scans vitamin E pills were placed at the former positions of the MEG  
545 localization coils for co-registration of MEG data and magnetic resonance images.

546 Behavioral responses were recorded using a fiberoptic response pad (Photon Control Inc.  
547 Lumitouch Control™ Response System) in combination with the Presentation software (Version  
548 9.90, Neurobehavioral Systems).

#### 549 ***Statistical analysis of behavioral data***

550 Responses were classified as correct or incorrect based on the subject's first answer. For hit rate  
551 analysis the accuracy for each condition was calculated. For reaction time analysis only correct  
552 responses were considered.

553 Post-hoc Wilcoxon signed rank tests were performed on hitrates as well as reaction times. To  
554 account for multiple testing, sequential Bonferroni-Holm correction (Holm, 1979) was applied  
555 (uncorrected alpha = 0.05).

#### 556 ***MEG-data preprocessing***

557 MEG Data analysis was performed with the open source Matlab toolbox Fieldtrip (Oostenveld et  
558 al., 2011; Version 2013 11-11) and custom Matlab scripts.

559 Only trials with correct behavioral responses were taken into account for MEG data analysis. The  
560 focus of data analysis was on the prestimulus intervals from 1 s to 0.050 s before stimulus onset.  
561 Trials containing sensor jump-, or muscle-artefacts were rejected using automatic FieldTrip artefact  
562 rejection routines. Line noise was removed using a discrete Fourier transform filter at 50,100 and  
563 150 Hz. In addition, independent component analysis (ICA; Makeig et al., 1996) was performed  
564 using the extended infomax (runica) algorithm implemented in fieldtrip/EEGLAB. ICA components  
565 strongly correlated with EOG and ECG channels were removed from the data. Finally, data was  
566 visually inspected for residual artefacts.

567 In order to minimize movement related errors, the mean head position over all experimental blocks  
568 was determined for each subject. Only trials in which the head position did not deviate more than 5

569 mm from the mean head position were considered for further analysis.

570 As artefact rejection and trial rejection based on the head position may result in different trial  
571 numbers for Face and House blocks, after trial rejection the minimum amount of trials across Face  
572 and House blocks was selected randomly from the available trials in each block (stratification).

### 573 ***Sensor level spectral analysis***

574 Spectral analysis at the sensor level was performed in order to determine the subdivision of the  
575 power spectrum in frequency bands (see Brodski et al., 2015 for a similar approach). As we aimed  
576 to identify frequency bands based on stimulus related increases or decreases, respectively, before  
577 spectral analysis new data segments were cut from -0.55 to 0.55 s around stimulus onset. For  
578 spectral analysis we used a multitaper approach (Percival and Walden, 1993) based on Slepian  
579 sequences (Slepian, 1978). The spectral transformation was applied in an interval from 4 to 150 Hz  
580 in 2 Hz steps in time steps of 0.01 s and using two slepian tapers for each frequency. For each  
581 subject, time-frequency representations were averaged for Face blocks and House blocks as well  
582 as within the time interval of “baseline” (-0.35 s – 0.05 s) and “task” (0.05 s – 0.35 s), respectively.  
583 Average spectra of task and baseline period were contrasted over subjects using a dependent-  
584 sample permutation t-metric with a cluster based correction method (Maris and Oostenveld, 2007)  
585 to account for multiple comparisons. Adjacent samples whose *t*-values exceeded a threshold  
586 corresponding to an uncorrected  $\alpha$ -level of 0.05 were defined as clusters. The resulting cluster  
587 sizes were then tested against the distribution of cluster sizes obtained from 1000 permuted  
588 datasets (i.e. labels “task” and “baseline” were randomly reassigned within each of the subjects).  
589 Cluster sizes larger than the 95th percentile of the cluster sizes in the permuted datasets were  
590 defined as significant.

591 Following the same approach as Brodski and colleagues (2015) based on the significant clusters of  
592 the task vs. baseline statistics five frequency bands were defined for further analysis: (1) 8–14 Hz  
593 (alpha); (2) 14–32 Hz (beta); (3) 32–56 Hz (low gamma); (4) 56–64 Hz (mid gamma) and (5) 64–  
594 150 Hz (high gamma) (Figure 8).

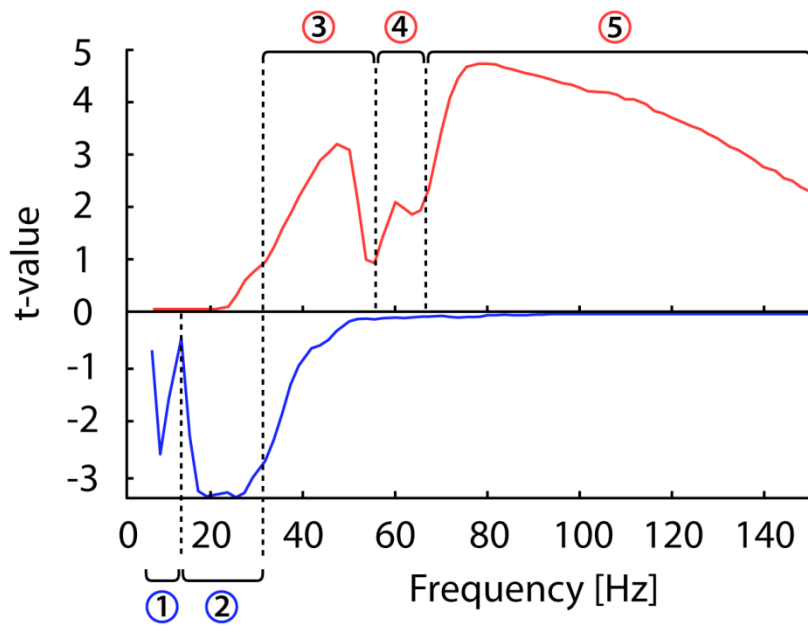

595

596 **Figure 8. Sensor-level frequency analysis - defining frequency bands.** Power spectra for all of  
597 the significant clusters (one positive and one negative cluster) at the sensor level (permutation t-  
598 metric, contrast [0.05s 0.35s] vs [-0.35s -0.05s] around stimulus onset,  $t$  values masked by  $p <$   
599 0.05, cluster correction,  $n = 52$ ). Frequency analysis at the sensor level was calculated using both  
600 blocks types jointly. Task-related increases in power are shown in red (positive cluster) and task-  
601 related decreases in blue (negative cluster). Black dashed lines frame the identified frequency  
602 ranges.

### 603 **Source grid creation**

604 In order to create individual source grids we transformed the anatomical MR images to a standard  
605 T1 MNI template from the SPM8 toolbox (<http://www.fil.ion.ucl.ac.uk/spm>) - obtaining an individual  
606 transformation matrix for each subject. We then warped a regular 3-D dipole grid based on the  
607 standard T1 template (spacing 15mm resulting in 478 grid locations) with the inverse of each  
608 subjects' transformation matrix, to obtain an individual dipole grid for each subject in subject space.  
609 This way, each specific grid point was located at the same brain area for each subject, which  
610 allowed us to perform source analysis with individual head models as well as multi-subject  
611 statistics for all grid locations. Lead fields at those grid locations were computed for the individual  
612 subjects with a realistic single shell forward model (Nolte, 2003) taking into account the effects of  
613 the ICA component removal in pre-processing.

614 **Source time course reconstruction**

615

616 To enable a whole brain analysis of active information storage (AIS), we reconstructed the source  
617 time courses for all 478 source grid locations.

618 For source time course reconstruction we calculated a time-domain beamformer filter (LCMV,  
619 linear constrained minimum variance; (Van Veen et al., 1997) based on broadband filtered data (8  
620 Hz high pass, 150 Hz low pass) from the prestimulus interval (-1 s to -0.050 s) of Face blocks as  
621 well as House blocks (use of common filters -see Gross et al., 2012, page 357).

622 For each source location three orthogonal filters were computed (x, y, z direction). To obtain the  
623 source time courses, the broadly filtered raw data was projected through the LCMV filters resulting  
624 in three time courses per location. On these source time courses we performed a singular value  
625 decomposition to obtain the time course in direction of the dominant dipole orientation. The source  
626 time course in direction of the dominant dipole orientation was used for calculation of active  
627 information storage (AIS).

628 **Definition of active information storage**

629 We assume that the reconstructed source time courses for each brain location can be treated as  
630 realizations  $\{x_1, \dots, x_t, \dots, x_N\}$  of a random process  $X = \{X_1, \dots, X_t, \dots, X_N\}$ , which consists of a  
631 collection of random variables,  $X_t$ , ordered by some integer  $t$ . AIS then describes how much of the  
632 information the next time step  $t$  of the process is predictable from its immediate past state  
633 (Lizier et al., 2012). This is defined as the mutual information

634 
$$A_x = \lim_{k \rightarrow \infty} I(X_{t-1}^k; X_t) = \lim_{k \rightarrow \infty} \sum_{x_t, x_{t-1}^k} p(x_t, x_{t-1}^k) \log \frac{p(x_{t-1}^k, x_t)}{p(x_{t-1}^k)p(x_t)} \quad (1)$$

635

636 where  $I$  is the mutual information and  $p(\cdot)$  are the variables' probability density functions. Variable  
637  $X_{t-1}^k$  describes the past *state* of  $X$  as a collection of past random variables  
638  $X_{t-1}^k = \{X_{t-1}, \dots, X_{t-1-(k*\tau)}\}$ , where  $k$  is the embedding dimension, i.e., the number of time steps  
639 used in the collection, and  $\tau$  the embedding delay between these time steps. For practical

640 purposes,  $k$  has to be set to a finite value  $k_{\max}$ , such that the history before time point  $t - k_{\max} * \tau$   
641 does not further improve (statistically) the prediction of  $X_t$  from its past (Lizier et al., 2012).

#### 642 ***Analysis of predictable information using active information storage***

643 The history dimension ( $k_{\max}$ ; range 3 to 6) and optimal embedding delay parameter ( $\tau$ ; range 0.2  
644 to 0.5 in units of the autocorrelation decay time) was determined for each source location  
645 separately using Ragwitz' criterion (Ragwitz and Kantz, 2002), as implemented in the TRENTOOL  
646 toolbox (Lindner et al., 2011). To avoid a bias in estimated values based on different history  
647 dimensions, we chose the maximal history dimension across Face and House blocks for each  
648 source location (median  $k_{\max}$  over source locations and subjects =4).

649 The actual spacing between the time-points in the history was the median across trials of the  
650 output of Ragwitz' criterion for the embedding delay  $\tau$  (Lindner et al., 2011).

651 Based on the assumption of stationarity in the prestimulus interval, AIS was computed on the  
652 embedded data across all available time points and trials. This was done separately for each  
653 source location and condition in every subject.

654 Computation of AIS was performed using the Java Information Dynamics Toolkit (Lizier, 2014). A  
655 minimum of 68400 samples entered the AIS analysis for each subject, block type and source  
656 location (minimum of 57 trials, approx. 1 sec time interval, sampling rate 1200 Hz). AIS was  
657 estimated with 4 nearest neighbours in the joint embedding space using the Kraskov-Stoegbauer-  
658 Grassberger (KSG) estimator (Kraskov et al., 2004; algorithm 1), as implemented in the open  
659 source Java Information Dynamics Toolkit (JIDT; Lizier, 2014)

660 Computation of AIS was performed at the Center for Scientific Computing (CSC) Frankfurt using  
661 the high-performance computing Cluster FUCHS (<https://csc.uni-frankfurt.de/index.php?id=4>),  
662 which enabled the computationally demanding calculation of AIS for the whole brain across all  
663 subjects as well as Face and House blocks (478 x 52 x 2 = 49712 computations of AIS).

664

665 **AIS Statistics**

666 In order to determine the source locations in which AIS values were increased when subjects held  
667 face information in memory, a within-subject permutation t-metric was computed. Here, AIS values  
668 for each source location across all subjects were contrasted for Face blocks and House blocks.  
669 The permutation test was chosen as the distribution of AIS values is unknown and not assumed to  
670 be Gaussian. To account for multiple comparisons across the 478 source locations, a cluster-  
671 based correction method (Maris and Oostenveld, 2007) was used. Clusters were defined as  
672 adjacent voxels whose t-values exceeded a critical threshold corresponding to an uncorrected  
673 alpha level of 0.01. In the randomization procedure labels of Face block and House block data  
674 were randomly reassigned within each subject. Cluster sizes were tested against the distribution of  
675 cluster sizes obtained from 5000 permuted data sets. Cluster values larger than the 95th percentile  
676 of the distribution of cluster sizes obtained for the permuted data sets were considered to be  
677 significant.

678 **Correlation analysis**

679 We investigated the relationship of spectral power in the prestimulus interval and AIS values on the  
680 single trial level. Before calculation of the correlation coefficient, single trial spectral power in each  
681 of the predefined frequency bands and single trial AIS values were z-normalized for each subject.  
682 These values were appended for Face and House blocks, pooled over all subjects and  
683 Spearman's rho was calculated. Then, trials were shuffled 1000 times for spectral power and AIS  
684 values separately within each subject and correlation analysis was repeated for each  
685 randomization. Original correlation values larger than the 95<sup>th</sup> percentile of the distribution of  
686 correlation values in the shuffled data were considered as significant. This statistical procedure  
687 conforms to a permutation test of the correlation where permutations are restricted within the levels  
688 of the factor subjects.

689 We also calculated the correlation of t-values on AIS (based on the dependent sample t-metric,  
690 contrast Face blocks vs. House blocks) for all grid points at the source level with the t-values  
691 obtained from the same contrast based on beamformer reconstructed source power in the alpha  
692 (8-14 Hz) and beta (14-32 Hz) frequency band. Source power was reconstructed with the DICS

693 (dynamic imaging of coherent sources, Gross et al., 2001) algorithm as implemented in the  
694 FieldTrip toolbox using real values filter coefficients only (see also Grützner et al., 2010).

695 Last, we accessed the relationship of AIS values and reaction times for each subject. To this end  
696 for each subject mean reaction times and mean AIS values in the brain areas of interest for Face  
697 and House blocks were subtracted from each other. This allowed accounting for differential  
698 behavioral speed between subjects. The correlation of the difference in AIS values and the  
699 difference in reaction times was calculated using Spearman's rho and a one sided test for the  
700 hypothesis that the correlation was negative, i.e. that higher AIS values in face blocks were  
701 associated with faster performance. Significance was accessed using a permutation distribution:  
702 AIS differences were shuffled between subjects 5000 times independent of differences in reaction  
703 times and Spearman correlation was recomputed. The p-values were calculated as the proportion  
704 of permutations in which a more extreme (more negative) correlation value than the original  
705 correlation value was observed.

706 In order to facilitate interpretation of the results of the correlation of AIS and reaction times, we  
707 further report Bayes factors (BF) for the correlations. For calculation of the BFs we used the  
708 software JASP (JASP TEAM, 2016), applying a Bayesian correlation using Kendall's tau (van  
709 Doorn et al., 2016) using JASP standard parameters for the distributions resulting in uniform prior  
710 probabilities for H1 and H0. The Bayes factor represents the weight of evidence of one hypothesis  
711 over another (Jeffreys, 1998). Bayes factors above 3 and Bayes factors below 1/3 indicate reliable  
712 evidence for H1 or H0, respectively (Jeffreys, 1998). For equal priors of one-half for the null and  
713 the alternative hypothesis a BF of 3 indicates that the posterior odds are 3:1 in favor of the  
714 alternative hypothesis, i.e. that the alternative hypothesis is three times more probable than the null  
715 hypothesis given the data and the prior probabilities of both hypotheses. We report the Bayes  
716 factor ( $BF_{10} = BF_{-0}$ ) for the hypothesis H1 (or H-) that AIS differences are negatively associated  
717 with reaction time differences, compared to the null hypothesis H0 that AIS is uncorrelated or  
718 positively correlated with reaction times.

719

720

## 721 **Definition of transfer entropy (and Granger analysis)**

722 Transfer entropy (TE, Schreiber, 2000) was applied to investigate the information transfer between  
723 the brain areas identified with AIS analysis. For links with significant information transfer, we post-  
724 hoc studied the spectral fingerprints of these links using spectral Granger analysis (Granger,  
725 1969).

726 Both, TE and Granger analysis are implementations of Wiener's principle (Wiener, 1956) which in  
727 short can be rephrased as follows: If the prediction of the future of one time series  $X$ , can be  
728 improved in comparison to predicting it from the past of  $X$  alone by adding information from the  
729 past of another time series  $Y$ , then information is transferred from  $Y$  to  $X$ .

730 TE is an information-theoretic, model-free implementation of Wiener's principle and can be used, in  
731 contrast to Granger analysis, in order to study linear as well as non-linear interactions (e.g. Vicente  
732 et al., 2011) and was previously applied to broadband MEG source data (Wibral et al., 2011). TE is  
733 defined as a conditional mutual information

$$\begin{aligned} 734 \quad TE_{Y \rightarrow X} &= \lim_{j,k \rightarrow \infty} I(X_t; Y_{t-u}^j | X_{t-1}^k) \\ 735 \quad &= \lim_{j,k \rightarrow \infty} \sum_{x_t, x_{t-1}^k, y_{t-u}^j} p(x_t, x_{t-1}^k, y_{t-u}^j) \log \frac{p(x_t | x_{t-1}^k, y_{t-u}^j)}{p(x_t | x_{t-1}^k)} \quad (2) \end{aligned}$$

736 Where  $X_t$  describes the future of the target time series  $X$ ,  $X_{t-1}^k$  describes the past state of  $X$ , and  
737  $Y_{t-u}^j$  describes the past state of the source time series  $Y$ . As for the calculation of AIS, past states  
738 are defined as collections of past random variables with number of time steps  $j$  and  $k$  and a delay  
739  $\tau$ . The parameter  $u$  accounts for a physical delay between processes  $Y$  and  $X$  (Wibral et al., 2013)  
740 and can be optimized by finding the maximum TE over a range of assumed values for  $u$ .

## 741 **Analysis of information transfer using transfer entropy and Granger causality analysis**

742 We performed TE analysis with the open-source Matlab toolbox TRENTOOL (Lindner et al., 2011),  
743 which implements the KSG-estimator (Kraskov et al., 2004; Frenzel and Pompe, 2007; Gómez-  
744 Herrero et al., 2015) for TE estimation. We used ensemble estimation (Wollstadt et al., 2014;  
745 Gómez-Herrero et al., 2015), which estimates TE from data pooled over trials to obtain more data  
746 and hence more robust TE-estimates. Additionally, we used FAES correction method to account  
747 for volume conduction (Faes et al., 2013).



748 In the TE analysis the same time intervals (prestimulus) and embedding parameters as for AIS  
749 analysis were used. TE values for Face blocks and House blocks were contrasted using a  
750 dependent-sample permutation t-metric for statistical analysis across subjects. In the statistical  
751 analysis, FDR correction was used to account for multiple comparisons across links (uncorrected  
752 alpha level 0.05). As for AIS, the history dimension for the past states was set to finite values; we  
753 here set  $j_{\max} = k_{\max}$  and used the values obtained during AIS estimation for the target time series  
754 of each signal combination.

755 For the significant TE links post-hoc nonparametric bivariate Granger causality analysis in the  
756 frequency domain (Dhamala et al., 2008) was computed. Using the nonparametric variant of  
757 Granger causality analysis avoids choosing an autoregressive model order, which may easily  
758 introduce a bias. In the nonparametric approach Granger causality is computed from a  
759 factorization of the spectral density matrix, which is based on the direct Fourier transform of the  
760 time series data (Dhamala et al., 2008). The Wilson algorithm was used for factorization (Wilson,  
761 1972). A spectral resolution of 2 Hz and a spectral smoothing of 5 Hz were used for spectral  
762 transformation using the multitaper approach (Percival and Walden, 1993) (9 Slepian tapers). We  
763 were interested in the differences of Granger spectral fingerprints of Face and House blocks,  
764 however we also wanted to make sure that the Granger values for these difference significantly  
765 differed from noise. For that reason we created two additional “random” conditions by permuting  
766 the trials for the Face block and the House block condition for each source separately. Two types  
767 of statistical comparisons were performed for the frequency range between 8 and 150 Hz and each  
768 of the significant TE links: 1. Granger values in Face blocks were contrasted with Granger values  
769 in House blocks using a dependent-samples permutation t-metric 2. Granger values in Face  
770 blocks/House blocks were contrasted with the random Face block condition / random House block  
771 condition using another dependent-samples permutation t-metric. For the first test a cluster-  
772 correction was used to account for multiple comparisons across frequency (Maris and Oostenveld,  
773 2007). Adjacent samples which uncorrected p-values were below 0.01 were considered as  
774 clusters. 5000 permutations were performed and the alpha value was set to 0.05. Frequency  
775 intervals in the Face block vs. House block comparison were only considered as significant if all

776 included frequencies also reached significance in the comparison with the random conditions using  
777 a Bonferroni-Holms correction to account for multiple comparisons.  
778

779 **References**

- 780 Baldauf, D., Desimone, R., 2014. Neural Mechanisms of Object-Based Attention. *Science* 344,  
781 424–427. doi:10.1126/science.1247003
- 782 Barton, J.J., 2008. Structure and function in acquired prosopagnosia: lessons from a series of 10  
783 patients with brain damage. *J. Neuropsychol.* 2, 197–225.
- 784 Bastos, A.M., Usrey, W.M., Adams, R.A., Mangun, G.R., Fries, P., Friston, K.J., 2012. Canonical  
785 microcircuits for predictive coding. *Neuron* 76, 695–711.
- 786 Bastos, A.M., Vezoli, J., Bosman, C.A., Schoffelen, J.-M., Oostenveld, R., Dowdall, J.R., De  
787 Weerd, P., Kennedy, H., Fries, P., 2015. Visual areas exert feedforward and feedback  
788 influences through distinct frequency channels. *Neuron* 85, 390–401.
- 789 Bauer, M., Stenner, M.-P., Friston, K.J., Dolan, R.J., 2014. Attentional Modulation of Alpha/Beta  
790 and Gamma Oscillations Reflect Functionally Distinct Processes. *J. Neurosci.* 34, 16117–  
791 16125.
- 792 Bressler, S.L., Richter, C.G., 2015. Interareal oscillatory synchronization in top-down neocortical  
793 processing. *Curr. Opin. Neurobiol.* 31, 62–66.
- 794 Brodski, A., Paasch, G.-F., Helbling, S., Wibral, M., 2015. The Faces of Predictive Coding. *J.*  
795 *Neurosci.* 35, 8997–9006. doi:10.1523/JNEUROSCI.1529-14.2015
- 796 Buffalo, E.A., Fries, P., Landman, R., Buschman, T.J., Desimone, R., 2011. Laminar differences in  
797 gamma and alpha coherence in the ventral stream. *Proc. Natl. Acad. Sci.* 108, 11262–  
798 11267.
- 799 Busch, N.A., Herrmann, C.S., 2003. Object-load and feature-load modulate EEG in a short-term  
800 memory task. *Neuroreport* 14, 1721–1724.
- 801 Buschman, T.J., Miller, E.K., 2007. Top-Down Versus Bottom-Up Control of Attention in the  
802 Prefrontal and Posterior Parietal Cortices. *Science* 315, 1860–1862.  
803 doi:10.1126/science.1138071
- 804 Button, K.S., Ioannidis, J.P., Mokrysz, C., Nosek, B.A., Flint, J., Robinson, E.S., Munafò, M.R.,  
805 2013. Power failure: why small sample size undermines the reliability of neuroscience. *Nat.*  
806 *Rev. Neurosci.*
- 807 Cavanagh, P., 1991. What's up in top-down processing. *Represent. Vis. Trends Tacit Assumpt.*  
808 *Vis. Res.* 295–304.
- 809 Clark, A., 2012. Whatever next? Predictive brains, situated agents, and the future of cognitive  
810 science. *Behav Brain Sci.*
- 811 Cooper, N.R., Burgess, A.P., Croft, R.J., Gruzelier, J.H., 2006. Investigating evoked and induced  
812 electroencephalogram activity in task-related alpha power increases during an internally  
813 directed attention task. *Neuroreport* 17, 205–208.
- 814 Corbetta, M., Miezin, F.M., Dobmeyer, S., Shulman, G.L., Petersen, S.E., 1990. Attentional  
815 modulation of neural processing of shape, color, and velocity in humans. *Science* 248,  
816 1556–1559. doi:10.1126/science.2360050

- 817 Desimone, R., Duncan, J., 1995. Neural mechanisms of selective visual attention. *Annu. Rev.*  
818 *Neurosci.* 18, 193–222.
- 819 Dhamala, M., Rangarajan, G., Ding, M., 2008. Estimating Granger causality from Fourier and  
820 wavelet transforms of time series data. *Phys. Rev. Lett.* 100, 018701.
- 821 Dolan, R.J., Fink, G.R., Rolls, E., Booth, M., Holmes, A., Frackowiak, R.S.J., Friston, K.J., 1997.  
822 How the brain learns to see objects and faces in an impoverished context. *Nature* 389,  
823 596–598.
- 824 Egner, T., Monti, J.M., Summerfield, C., 2010. Expectation and surprise determine neural  
825 population responses in the ventral visual stream. *J. Neurosci.* 30, 16601–16608.
- 826 Engel, A.K., Fries, P., 2010. Beta-band oscillations—signalling the status quo? *Curr. Opin.*  
827 *Neurobiol.* 20, 156–165.
- 828 Erickson, C.A., Desimone, R., 1999. Responses of macaque perirhinal neurons during and after  
829 visual stimulus association learning. *J. Neurosci.* 19, 10404–10416.
- 830 Esterman, M., Yantis, S., 2009. Perceptual expectation evokes category-selective cortical activity.  
831 *Cereb. Cortex* bhp188.
- 832 Faes, L., Nollo, G., Porta, A., 2013. Compensated transfer entropy as a tool for reliably estimating  
833 information transfer in physiological time series. *Entropy* 15, 198–219.
- 834 Farah, M.J., Tanaka, J.W., Drain, H.M., 1995. What causes the face inversion effect? *J. Exp.*  
835 *Psychol. Hum. Percept. Perform.* 21, 628–634. doi:10.1037/0096-1523.21.3.628
- 836 Frenzel, S., Pompe, B., 2007. Partial mutual information for coupling analysis of multivariate time  
837 series. *Phys. Rev. Lett.* 99, 204101.
- 838 Friston, K., 2010. The free-energy principle: a unified brain theory? *Nat. Rev. Neurosci.* 11, 127–  
839 138. doi:10.1038/nrn2787
- 840 Friston, K., 2005. A theory of cortical responses. *Philos. Trans. R. Soc. B Biol. Sci.* 360, 815–836.  
841 doi:10.1098/rstb.2005.1622
- 842 George, D., Hawkins, J., 2009. Towards a Mathematical Theory of Cortical Micro-circuits. *PLoS*  
843 *Comput Biol* 5, e1000532. doi:10.1371/journal.pcbi.1000532
- 844 Gómez, C., Lizier, J.T., Schaum, M., Wollstadt, P., Grützner, C., Uhlhaas, P., Freitag, C.M., Schlitt,  
845 S., Bölte, S., Hornero, R., 2014. Reduced predictable information in brain signals in autism  
846 spectrum disorder. *Front. Neuroinformatics* 8.
- 847 Gómez-Herrero, G., Wu, W., Rutanen, K., Soriano, M.C., Pipa, G., Vicente, R., 2015. Assessing  
848 coupling dynamics from an ensemble of time series. *Entropy* 17, 1958–1970.
- 849 Granger, C.W.J., 1969. Investigating Causal Relations by Econometric Models and Cross-spectral  
850 Methods. *Econometrica* 37, 424–438. doi:10.2307/1912791
- 851 Gross, J., Baillet, S., Barnes, G.R., Henson, R.N., Hillebrand, A., Jensen, O., Jerbi, K., Litvak, V.,  
852 Maess, B., Oostenveld, R., 2012. Good-practice for conducting and reporting MEG  
853 research. *NeuroImage*.

- 854 Gross, J., Kujala, J., Hamalainen, M., Timmermann, L., Schnitzler, A., Salmelin, R., 2001. Dynamic  
855 imaging of coherent sources: Studying neural interactions in the human brain. *Proc. Natl.*  
856 *Acad. Sci. U. S. A.* 98, 694–699. doi:10.1073/pnas.98.2.694
- 857 Grützner, C., Uhlhaas, P.J., Genc, E., Kohler, A., Singer, W., Wibral, M., 2010.  
858 Neuroelectromagnetic Correlates of Perceptual Closure Processes. *J. Neurosci.* 30, 8342–  
859 8352. doi:10.1523/JNEUROSCI.5434-09.2010
- 860 Haxby, J.V., Hoffman, E.A., Gobbini, M.I., 2000. The distributed human neural system for face  
861 perception. *Trends Cogn. Sci.* 4, 223–233. doi:10.1016/S1364-6613(00)01482-0
- 862 Hillyard, S.A., Vogel, E.K., Luck, S.J., 1998. Sensory gain control (amplification) as a mechanism  
863 of selective attention: electrophysiological and neuroimaging evidence. *Philos. Trans. R.*  
864 *Soc. Lond. B Biol. Sci.* 353, 1257–1270.
- 865 Hohwy, J., 2013. *The Predictive Mind*. Oxford University Press.
- 866 Holm, S., 1979. A Simple Sequentially Rejective Multiple Test Procedure. *Scand. J. Stat.* 6, 65–70.
- 867 Huang, Y., Rao, R.P., 2011. Predictive coding. *Wiley Interdiscip. Rev. Cogn. Sci.* 2, 580–593.
- 868 Jeffreys, H., 1998. *The theory of probability*. OUP Oxford.
- 869 Jensen, O., Gelfand, J., Kounios, J., Lisman, J.E., 2002. Oscillations in the alpha band (9–12 Hz)  
870 increase with memory load during retention in a short-term memory task. *Cereb. Cortex* 12,  
871 877–882.
- 872 Kaiser, J., Heidegger, T., Wibral, M., Altmann, C.F., Lutzenberger, W., 2007. Alpha  
873 synchronization during auditory spatial short-term memory. *Neuroreport* 18, 1129–1132.
- 874 Kanwisher, N., McDermott, J., Chun, M.M., 1997. The fusiform face area: a module in human  
875 extrastriate cortex specialized for face perception. *J. Neurosci.* 17, 4302–4311.
- 876 Kemelmacher-Shlizerman, I., Basri, R., Nadler, B., 2008. 3D shape reconstruction of Mooney  
877 faces, in: *Computer Vision and Pattern Recognition, 2008. CVPR 2008. IEEE Conference*  
878 *on*. pp. 1–8.
- 879 Kok, P., Failing, M.F., de Lange, F.P., 2014. Prior expectations evoke stimulus templates in the  
880 primary visual cortex. *J. Cogn. Neurosci.* 26, 1546–1554.
- 881 Kraskov, A., Stögbauer, H., Grassberger, P., 2004. Estimating mutual information. *Phys. Rev. E*  
882 69, 066138.
- 883 Kriegeskorte, N., Formisano, E., Singer, B., Goebel, R., 2007. Individual faces elicit distinct  
884 response patterns in human anterior temporal cortex. *Proc. Natl. Acad. Sci.* 104, 20600–  
885 20605.
- 886 Lindner, M., Vicente, R., Priesemann, V., Wibral, M., 2011. TRENTOOL: A Matlab open source  
887 toolbox to analyse information flow in time series data with transfer entropy. *BMC Neurosci.*  
888 12, 119. doi:10.1186/1471-2202-12-119
- 889 Lizier, J.T., 2014. JIDT: an information-theoretic toolkit for studying the dynamics of complex  
890 systems. *Comput. Intell.* 1, 11. doi:10.3389/frobt.2014.00011

- 891 Lizier, J.T., Prokopenko, M., Zomaya, A.Y., 2012. Local measures of information storage in  
892 complex distributed computation. *Inf. Sci.* 208, 39–54. doi:10.1016/j.ins.2012.04.016
- 893 Makeig, S., Bell, A.J., Jung, T.-P., Sejnowski, T.J., 1996. Independent component analysis of  
894 electroencephalographic data. *Adv. Neural Inf. Process. Syst.* 145–151.
- 895 Maris, E., Oostenveld, R., 2007. Nonparametric statistical testing of EEG- and MEG-data. *J.*  
896 *Neurosci. Methods* 164, 177–190. doi:10.1016/j.jneumeth.2007.03.024
- 897 Marr, D., 1982. *Vision* San Francisco. W H Freeman Co.
- 898 Mayer, A., Schwiedrzik, C.M., Wibral, M., Singer, W., Melloni, L., 2015. Expecting to See a Letter:  
899 Alpha Oscillations as Carriers of Top-Down Sensory Predictions. *Cereb. Cortex* bhv146.
- 900 Michalareas, G., Vezoli, J., van Pelt, S., Schoffelen, J.-M., Kennedy, H., Fries, P., 2016. Alpha-  
901 Beta and Gamma Rhythms Subserve Feedback and Feedforward Influences among  
902 Human Visual Cortical Areas. *Neuron*.
- 903 Mooney, C.M., 1957. Age in the development of closure ability in children. *Can. J. Psychol. Can.*  
904 *Psychol.* 11, 219–226. doi:10.1037/h0083717
- 905 Mooney, C.M., Ferguson, G.A., 1951. A new closure test. *Can. J. Psychol. Can. Psychol.* 5, 129–  
906 133. doi:10.1037/h0083540
- 907 Mumford, D., 1992. On the computational architecture of the neocortex. *Biol. Cybern.* 66, 241–251.
- 908 Nolte, G., 2003. The magnetic lead field theorem in the quasi-static approximation and its use for  
909 magnetoencephalography forward calculation in realistic volume conductors. *Phys. Med.*  
910 *Biol.* 48, 3637–3652.
- 911 Oldfield, R.C., 1971. The assessment and analysis of handedness: The Edinburgh inventory.  
912 *Neuropsychologia* 9, 97–113. doi:10.1016/0028-3932(71)90067-4
- 913 Oostenveld, R., Fries, P., Maris, E., Schoffelen, J.-M., 2011. FieldTrip: open source software for  
914 advanced analysis of MEG, EEG, and invasive electrophysiological data. *Comput. Intell.*  
915 *Neurosci.* 2011, 1.
- 916 Pashkam, M.V., Xu, Y., 2014. Decoding visual object representation in human parietal cortex. *J.*  
917 *Vis.* 14, 1307–1307.
- 918 Peelen, M.V., Kastner, S., 2011. A neural basis for real-world visual search in human  
919 occipitotemporal cortex. *Proc. Natl. Acad. Sci.* 108, 12125–12130.
- 920 Pelt, S. van, Heil, L., Kwisthout, J., Ondobaka, S., Rooij, I. van, Bekkering, H., 2016. Beta- and  
921 gamma-band activity reflect predictive coding in the processing of causal events. *Soc.*  
922 *Cogn. Affect. Neurosci.* nsw017. doi:10.1093/scan/nsw017
- 923 Percival, D.B., Walden, A.T., 1993. *Spectral Analysis for Physical Applications*. Cambridge  
924 University Press.
- 925 Pitcher, D., Walsh, V., Duchaine, B., 2011. The role of the occipital face area in the cortical face  
926 perception network. *Exp. Brain Res.* 209, 481–493.
- 927 Puri, A.M., Wojciulik, E., Ranganath, C., 2009. Category expectation modulates baseline and  
928 stimulus-evoked activity in human inferotemporal cortex. *Brain Res.* 1301, 89–99.

- 929 Ragwitz, M., Kantz, H., 2002. Markov models from data by simple nonlinear time series predictors  
930 in delay embedding spaces. *Phys. Rev. E* 65, 056201. doi:10.1103/PhysRevE.65.056201
- 931 Ranganath, C., Cohen, M.X., Dam, C., D'Esposito, M., 2004. Inferior Temporal, Prefrontal, and  
932 Hippocampal Contributions to Visual Working Memory Maintenance and Associative  
933 Memory Retrieval. *J. Neurosci.* 24, 3917–3925. doi:10.1523/JNEUROSCI.5053-03.2004
- 934 Rao, R.P.N., Ballard, D.H., 1999. Predictive coding in the visual cortex: a functional interpretation  
935 of some extra-classical receptive-field effects. *Nat. Neurosci.* 2, 79–87.
- 936 Sakai, K., Miyashita, Y., 1991. Neural organization for the long-term memory of paired associates.  
937 *Nature* 354, 152–155. doi:10.1038/354152a0
- 938 Schreiber, T., 2000. Measuring information transfer. *Phys. Rev. Lett.* 85, 461.
- 939 Sedley, W., Gander, P.E., Kumar, S., Kovach, C.K., Oya, H., Kawasaki, H., Iii, M.A.H., Griffiths,  
940 T.D., 2016. Neural signatures of perceptual inference. *eLife* 5, e11476.  
941 doi:10.7554/eLife.11476
- 942 Slepian, D., 1978. Prolate spheroidal wave functions, Fourier analysis and uncertainty. *Bell Syst*  
943 *Tech J* 57, 1371–1429.
- 944 Smith, F.W., Muckli, L., 2010. Nonstimulated early visual areas carry information about  
945 surrounding context. *Proc. Natl. Acad. Sci.* 107, 20099–20103.  
946 doi:10.1073/pnas.1000233107
- 947 Stokes, M., Thompson, R., Cusack, R., Duncan, J., 2009. Top-down activation of shape-specific  
948 population codes in visual cortex during mental imagery. *J. Neurosci.* 29, 1565–1572.
- 949 Summerfield, C., Egner, T., Greene, M., Koechlin, E., Mangels, J., Hirsch, J., 2006a. Predictive  
950 Codes for Forthcoming Perception in the Frontal Cortex. *Science* 314, 1311–1314.  
951 doi:10.1126/science.1132028
- 952 Summerfield, C., Egner, T., Mangels, J., Hirsch, J., 2006b. Mistaking a house for a face: neural  
953 correlates of misperception in healthy humans. *Cereb. Cortex N. Y. N* 1991 16, 500–508.  
954 doi:10.1093/cercor/bhi129
- 955 JASP Team, 2016. JASP (Version 0.8. 0.0). [Computer Software]
- 956 Trapp, S., Lepsien, J., Kotz, S.A., Bar, M., 2015. Prior probability modulates anticipatory activity in  
957 category-specific areas. *Cogn. Affect. Behav. Neurosci.* 1–10.
- 958 Tsao, D.Y., Moeller, S., Freiwald, W.A., 2008. Comparing face patch systems in macaques and  
959 humans. *Proc. Natl. Acad. Sci.* 105, 19514–19519.
- 960 Van Belle, G., De Graef, P., Verfaillie, K., Busigny, T., Rossion, B., 2010. Whole not hole: Expert  
961 face recognition requires holistic perception. *Neuropsychologia* 48, 2620–2629.
- 962 Van Doorn, J., Ly, A., Marsman, M., Wagenmakers E-J., in press. Bayesian Inference for Kendall's  
963 Rank Correlation Coefficient. *Am. Stat.*
- 964 Van Veen, B.D., Van Drongelen, W., Yuchtman, M., Suzuki, A., 1997. Localization of brain  
965 electrical activity via linearly constrained minimum variance spatial filtering. *IEEE Trans.*  
966 *Biomed. Eng.* 44, 867–880. doi:10.1109/10.623056

- 967 Vicente, R., Wibral, M., Lindner, M., Pipa, G., 2011. Transfer entropy—a model-free measure of  
968 effective connectivity for the neurosciences. *J. Comput. Neurosci.* 30, 45–67.
- 969 Vuilleumier, P., Schwartz, S., 2001. Emotional facial expressions capture attention. *Neurology* 56,  
970 153–158.
- 971 Wagner, A.D., Shannon, B.J., Kahn, I., Buckner, R.L., 2005. Parietal lobe contributions to episodic  
972 memory retrieval. *Trends Cogn. Sci.* 9, 445–453.
- 973 Wibral, M., Lizier, J.T., Vögler, S., Priesemann, V., Galuske, R., 2014. Local active information  
974 storage as a tool to understand distributed neural information processing. *Front.*  
975 *Neuroinformatics* 8. doi:10.3389/fninf.2014.00001
- 976 Wibral, M., Pampu, N., Priesemann, V., Siebenhühner, F., Seiwert, H., Lindner, M., Lizier, J.T.,  
977 Vicente, R., 2013. Measuring information-transfer delays. *PLoS One* 8, e55809.
- 978 Wibral, M., Rahm, B., Rieder, M., Lindner, M., Vicente, R., Kaiser, J., 2011. Transfer entropy in  
979 magnetoencephalographic data: Quantifying information flow in cortical and cerebellar  
980 networks. *Prog. Biophys. Mol. Biol.* 105, 80–97.
- 981 Wiener, N., 1956. The theory of prediction. *Mod. Math. Eng.* N. Y. McGraw-Hill 165–190.
- 982 Wilson, G.T., 1972. The factorization of matricial spectral densities. *SIAM J. Appl. Math.* 23, 420–  
983 426.
- 984 Wollstadt, P., Martínez-Zarzuola, M., Vicente, R., Díaz-Pernas, F.J., Wibral, M., 2014. Efficient  
985 transfer entropy analysis of non-stationary neural time series. *PLoS One* 9, e102833.
- 986 Zhen, Z., Fang, H., Liu, J., 2013. The hierarchical brain network for face recognition. *PLoS One* 8,  
987 e59886.
- 988 Zipser, D., Kehoe, B., Littlewort, G., Fuster, J., 1993. A spiking network model of short-term active  
989 memory. *J. Neurosci.* 13, 3406–3420.
- 990
